# Supplementary material for: Ultra-long carrier lifetime in neutral graphene-hBN van der Waals heterostructures under mid-infrared illumination
Source: PubMed Central journal article supplement (PMC7018796; doi:10.1038/s41467-020-14714-1), 2020-02-13
Supplement: 41467_2020_14714_MOESM1_ESM.pdf [file 41467_2020_14714_MOESM1_ESM.pdf]

# Ultra-long carrier lifetime in neutral graphene-hBN van der Waals heterostructures under mid-infrared illumination

P. Huang<sup>1,2</sup>, E. Riccardi<sup>1</sup>, S. Messelot<sup>1</sup>, H. Graef<sup>1</sup>, F. Valmorra<sup>1</sup>, J. Tignon<sup>1</sup>, T. Taniguchi<sup>3</sup>, K. Watanabe<sup>3</sup>, S. Dhillon<sup>1</sup>, B. Plaçais<sup>1</sup>, R. Ferreira<sup>1</sup>, J. Mangeney<sup>1</sup>

<sup>1</sup> Laboratoire de Physique de l'Ecole normale supérieure, ENS, Université PSL, CNRS, Sorbonne Université, Université de Paris, F-75005 Paris, France

<sup>2</sup> State Key Laboratory of Precision Spectroscopy, East China Normal University, Shanghai 200062, China

<sup>3</sup> Advanced Materials Laboratory, National Institute for Materials Science, Tsukuba, Ibaraki 305-0047, Japan

## Supplementary Note 1: Electrical Characterization

The gate-dependent resistance of the hBN/graphene based device is measured as shown on Supplementary Figure 1 (black curve). Considering the contribution of both electron and holes to the conductance of the graphene sheet, the total resistance of a device can be calculated as:

$$R = \frac{L}{W} \frac{1}{\sigma} + 2R_c = \frac{L}{W} \frac{1}{q(\mu_e n_e + \mu_h n_h)} + 2R_c \quad (1)$$

with  $R_c$  the contact resistance of each electrodes and  $n$ , the local carrier density:

$$n = \sqrt{\left(\frac{\epsilon_0 \epsilon_{BN} |V_{GATE} - V_{DP}|}{e_{BN} q}\right)^2 + n_0^2} \quad (2)$$

with  $\epsilon_{BN}=3.2$  and the bottom hBN thickness is  $e_{BN}=67$  nm and  $n_0$  is the residual charge density induced by puddles.

Using (1) to fit the measured gate-dependent resistance of the device (red curve in Supplementary Figure 1, we extract a contact resistance of  $R_c=650 \Omega$ , a residual density  $n_0$  of  $\sim 4 \times 10^{14} \text{ cm}^{-2}$  and an electron and hole mobility of  $3.2 \text{ m}^2/\text{V}\cdot\text{s}$ . The effect of residual density  $n_0$  on transport behavior of graphene is impactful near the Dirac point whereas it is negligible far away from Dirac point. Indeed, extracting the carrier mobility from (1) is valid for gate induced net carrier density larger than the residual charge carrier density [S1]. This validates the estimation of carrier mobility from (1) close to the carrier photoexcitation energy of 58.5 meV since the fluctuation of Fermi level energy induced by residual carrier density are lower than  $E_{F0} = \hbar v_F \sqrt{\pi n_0} = 23.3 \text{ meV}$ .

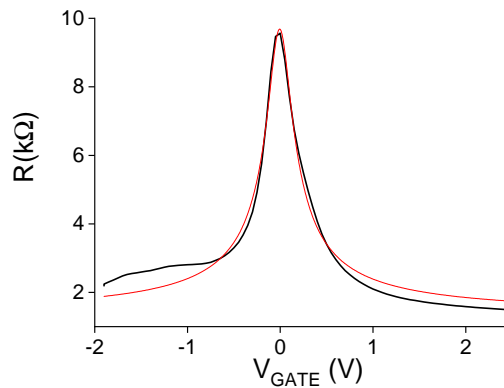

Supplementary Figure 1: Low-bias resistance measured at 4 K and  $V_{DS}=10$  mV (black curve) and the fit using (1) (red curve).

34

### 35 **Supplementary Note 2: Spatial profile of the photocurrent**

36 From usual knife-edge measurements, we determine the beam waist of the optical gaussian  
37 beam at the sample position,  $w_0=10.6 \mu\text{m}$ . We compare the normalized spatial profile of the  
38 measured photocurrent (black curve in Supplementary Figure 2) with the convolution (red  
39 curve in Supplementary Figure 2) of a constant photoresponse along the graphene channel,  
40 given by a rectangular function  $\Pi(L)$ , with the gaussian profile of the laser beam given by

41  $P_{inc} = P_0 e^{-\frac{x^2+y^2}{2\sigma^2}}$  (with  $\sigma= 5.3 \mu\text{m}$ ) and find a good agreement (without any adjustable

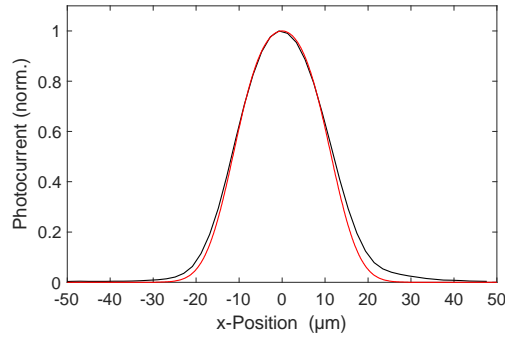

42 parameters).

43 **Supplementary Figure 2:** Normalized photocurrent line scan profile of the graphene/hBN heterostructure along  
44 the graphene channel for  $V_{DS}^* = 0.15 \text{ V}$  (black line) under continuous light excitation at  $10.6 \mu\text{m}$  wavelength  
45 measured at 4K and CNP. The red curve is the normalized convolution of a uniform photoresponse along the  
46 graphene channel given by a rectangular function with the gaussian profile of the laser beam  $P_{inc}$ .

47

### 48 **Supplementary Note 3: Calculation of absorbed light power by graphene**

49 The light absorption by the graphene layer is calculated considering the layered geometry of  
50 our device. We take into account the thickness and dielectric constants of each layer to find  
51 the electric field in the graphene plane. For this purpose, we use transfer-matrix method to  
52 calculate the electric field distribution within the layered structure. The light wavelength is  
53  $10.6 \mu\text{m}$ , the thicknesses of the top and bottom hBN dielectric films are  $\sim 67 \text{ nm}$  and  $15 \text{ nm}$   
54 respectively and the dielectric constant of hBN is 3.2. We have independently characterized  
55 the transmission of thin Ni films deposited on  $\text{SiO}_2/\text{Si}$  substrates to extract the dielectric  
56 constant of the 12 nm-thick Ni film and found  $\epsilon_{\text{Ni}}=9.06+37.87i$ , which is consistent with M.  
57 A. Ordal *et al.* [S2]. Supplementary Figure 3 shows the calculated spatial profile of the  
58 electric field  $E$  normalized by the incident electric field  $E_0$  along the layered structure. The  
59 electric field at the graphene plane is  $E_{\text{Graphene}} = 0.217E_0$ . We deduce the graphene  
60 absorption given by  $\alpha_0 = A(E_t/E_0)^2 = 0.11 \%$  where  $A=2.3 \%$  is the interband absorption in  
61 free space of a monolayer graphene (since the Fermi level energy  $E_F$  is lower than  $\hbar\omega/2$  at  
62 CNP).

63

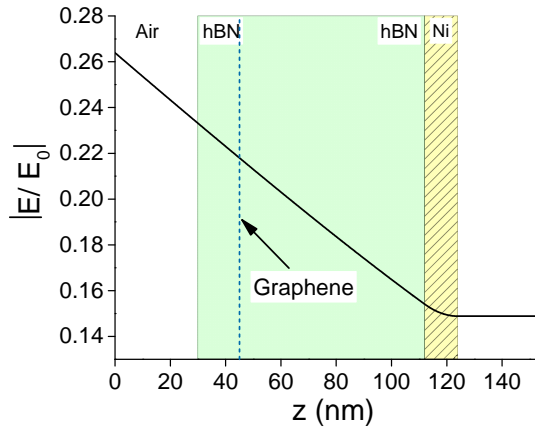

64  
65 **Supplementary Figure 3:** Calculated electric field distribution along the stack of the hBN/graphene  
66 heterostructure using a transfer-matrix method. The dashed line represents the graphene layer.  
67

#### 68 **Supplementary Note 4: Polarization dependence**

69 We investigate how the nonlinear behavior of the photocurrent with the incident power  
70 depends on light polarization at low bias. The saturation effect is attributed to efficient  
71 intraband carrier-carrier scatterings under intense illumination that lead to a broadening of the  
72 hot carrier distribution within the bands. Thus, some photoexcited electron-hole pairs are  
73 shifted to energetically higher states where they efficiently recombine in the hyperbolic  
74 optical phonon modes of the hBN layer. As out-of-equilibrium Zener-Klein carriers provide  
75 both an increased number of available intraband Coulomb scattering partners to the  
76 photoexcited carriers and also Pauli blocking at low energy, intraband carrier-carrier  
77 scatterings and thus saturation effects are expected to be enhanced when the lobes of the  
78 photoexcited carriers are parallel to the dc electric field where the Zener-Klein carrier density  
79 is maximized, i.e. for light polarization perpendicular to the dc electric field. Our analysis is  
80 well supported by Supplementary Figure 4 that highlights a more pronounced photocurrent  
81 saturation effect with the incident power for light polarization perpendicular to the dc electric  
82 field.

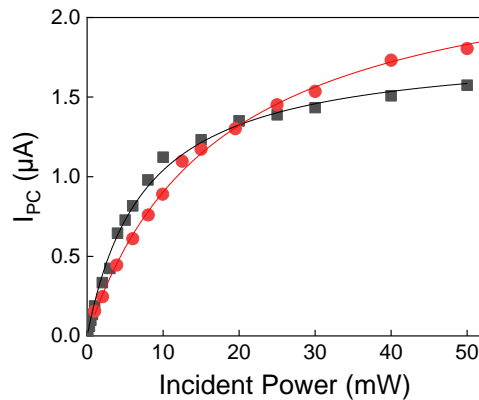

83  
84 **Supplementary Figure 4:** Photocurrent measured for light polarization perpendicular (black square symbols)  
85 and light polarization parallel (red circle symbols) to the graphene channel and the dc electric field. Using the  
86 standard saturation law given by  $I_{PC} = aP_{inc}/(1 + P_{inc}/P_{sat})$  (plain lines) we extract saturation powers of  
87  $P_{sat} \sim 15$  mW and 7.5 mW for light polarization parallel and perpendicular to the graphene channel respectively.  
88

## 89 Supplementary Note 5: HPhP emission in the two nonlinear regimes

90 We investigate the steady density of photoexcited electron–hole pairs supplied to the HPhP  
91 emission in the two nonlinear regimes. Applying (1) in the main manuscript, we extract in  
92 Supplementary Figure 5 (left) the photoexcited carrier density  $\Delta n_{\text{photo}}$  couple to the HPhP in  
93 the hBN layer at large  $V_{DS}^*$ , which falls in the range of  $0.5 \cdot 10^9 \text{ cm}^{-2}$  for  $P_{\text{inc}}=1 \text{ mW}$ , and the  
94 corresponding power drained away by HPhP emission given by  $P_{\text{HPP}} = \Delta n_{\text{photo}} \hbar \omega_{\text{HPP}} / \tau$   
95 which scales with the  $\mu\text{W}$  level. At large  $P_{\text{inc}}$ , we also extract  $\Delta n_{\text{photo}}$  (see Supplementary  
96 Figure 5 (right)) from the difference between the photocarrier density expected for  
97 photoconductive regime at large incident power (dashed blue line) and the photocarrier  
98 density estimated from equation (1) in the main manuscript and measurements (blue circle  
99 symbols). The photoexcited carrier density  $\Delta n_{\text{photo}}$  that couple to HPhP in the hBN layer  
100 (square black symbols) is in the range of  $10^9 \text{ cm}^{-2}$  and also follows a threshold behavior.

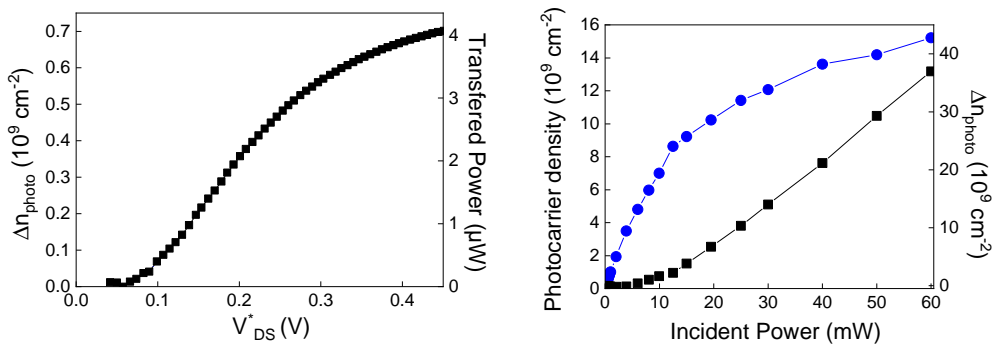

101

102 **Supplementary Figure 5:** Left: Photoexcited carrier density  $\Delta n_{\text{photo}}$  couple to the HPhP in the hBN layer and the  
103 power drained away by HPhP emission as a function of bias for  $P_{\text{inc}}=1 \text{ mW}$  extracted from  $\Delta I_{\text{PC}}$  using a rate-  
104 equations approach. Right: Photocarrier density,  $n_{\text{photo}}$ , as a function of the incident power extracted from  
105 electrical characterization (blue circles and left vertical axis) and  $\Delta n_{\text{photo}}$  (black squares and right vertical axis)  
106 the difference between the photocarrier density expected for photoconductive regime at large incident power  
107 (dashed blue line) and  $n_{\text{photo}}$  showing a threshold behavior with the incident power.

108

## 109 Supplementary references

110 [S1] Zhong, H., Zhang, Zhiyong, Xu, Haitao, Qiu, Chenguang & Peng, Lian-Mao,  
111 Comparison of mobility extraction methods based on field-effect measurements for graphene,  
112 AIP Adv. **5**, 057136 (2015)

113 [S2] Ordal M. A., et al. Optical properties of the metals Al, Co, Cu, Au, Fe, Pb, Ni, Pd, Pt,  
114 Ag, Ti, and W in the infrared and far infrared. Appl. Opt. **22**, 1099-1119 (1983)

115
